# Supplementary material for: Electrochemical fabrication of copper-containing metal–organic framework films as amperometric detectors for bromate determination
Source: Royal Society of Chemistry journal article supplement (doi:10.1039/c5dt04229a), 2016-01-01
Supplement: c5dt04229a1.pdf [file c5dt04229a1.pdf]

## Supporting Information

### **Electrochemical Fabrication of Copper-Containing Metal–Organic Framework Films as Amperometric Detectors for Bromate Determination**

*Erbin Shi<sup>a</sup>, Xiaoqin Zou<sup>b</sup>, Jia Liu<sup>c</sup>, Huiming Lin<sup>a</sup>, Feng Zhang<sup>\*a</sup>, Shaoxuan Shi<sup>a</sup>, Fenghua Liu<sup>a</sup>,  
Guangshan Zhu<sup>b</sup>, and Fengyu Qu<sup>\*a</sup>*

a College of Chemistry and Chemical Engineering, Harbin Normal University, Harbin, Heilongjiang 150025 (P.R. China)

b Key Laboratory of Polyoxometalate Science of the Ministry of Education, Faculty of Chemistry, Northeast Normal University, Changchun, Jilin 130024 (P.R. China)

c College of Chemistry, Jilin University, Changchun, Jilin 130012 (P.R. China)

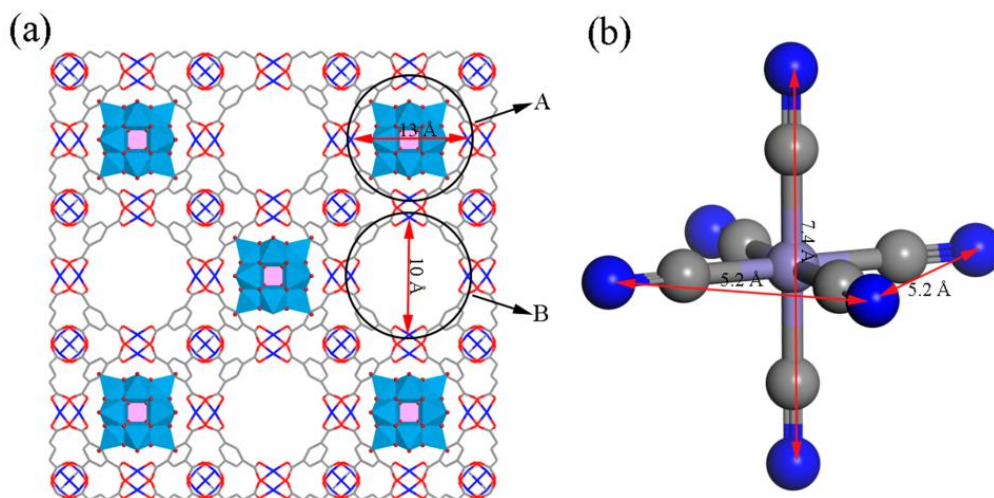

**Figure S1.** (a) View of a (001) sheet with two kinds of pores, A and B, in NENU-3, and (b) the structure of potassium ferricyanide ( $[\text{Fe}(\text{CN})_6]^{3-}$ ).

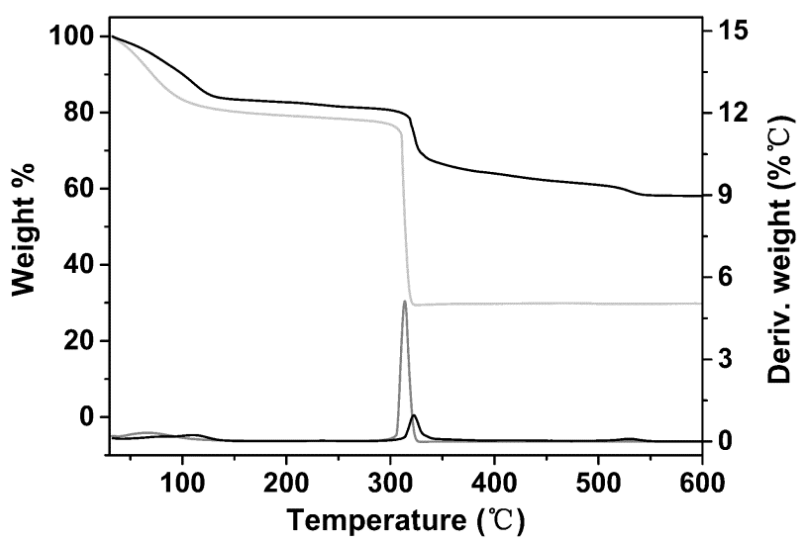

**Figure S2.** The thermogravimetric (TGA) and DTG analysis curves of  $\text{Cu}_3(\text{BTC})_2$  (gray) and NENU-3 (black).

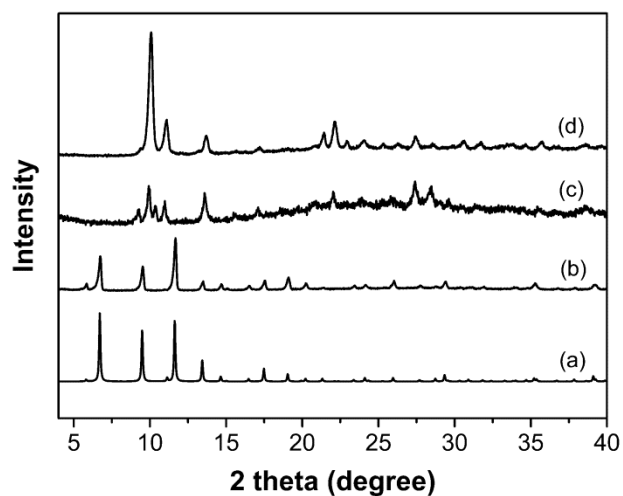

**Figure S3.** PXRD patterns for (a) the simulated  $\text{Cu}_3(\text{BTC})_2$  material, (b) the as-made  $\text{Cu}_3(\text{BTC})_2$  powders, and the  $\text{Cu}_3(\text{BTC})_2$  after the immersion in water at room temperature for (c) 15 min and (d) 24 h.

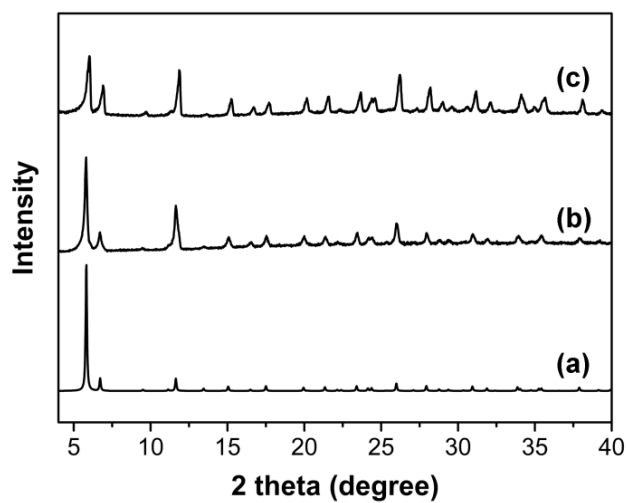

**Figure S4.** PXRD patterns for (a) the simulated NENU-3 material, (b) the NENU-3 film and the NENU-3 film after the immersion in water at room temperature for (c) 24 h.

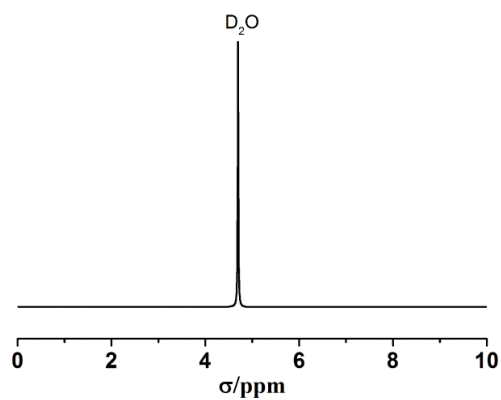

**Figure S5.** <sup>1</sup>H NMR spectrum of the aqueous after soaking NENU-3 for 24 hours.

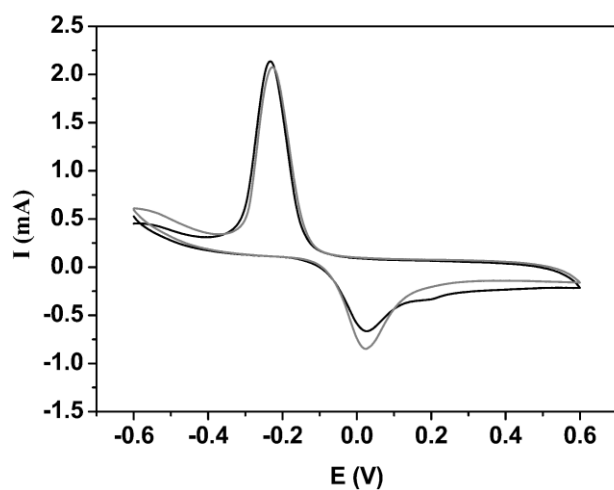

**Figure S6.** Cyclic voltammetric curves of bare copper substrate measured in the B-R buffer solution (pH 6.5) at a scan rate of 50 mV s<sup>-1</sup> before (black) and after (gray) adding 0.3 mM of bromate.

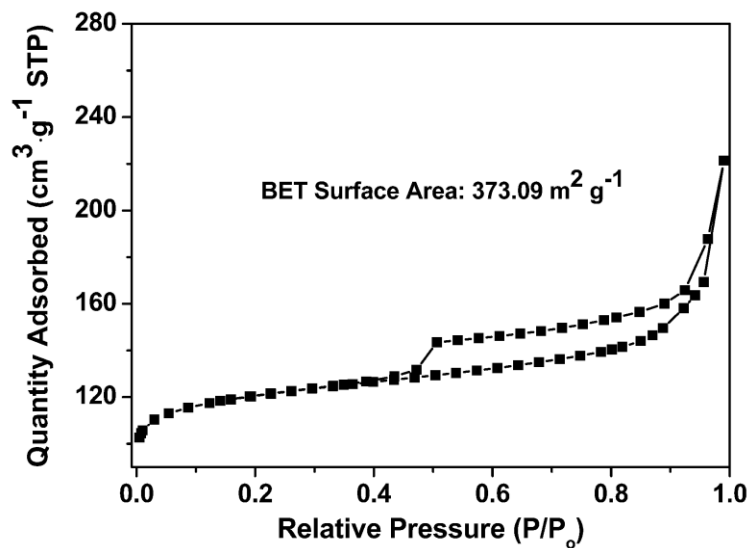

**Figure S7.**  $\text{N}_2$  adsorption-desorption isotherm of the NENU-3 material.

The sample was pretreated in vacuum at  $120^\circ\text{C}$  overnight and the sorption analysis was performed on Micromeritics Tristar II.

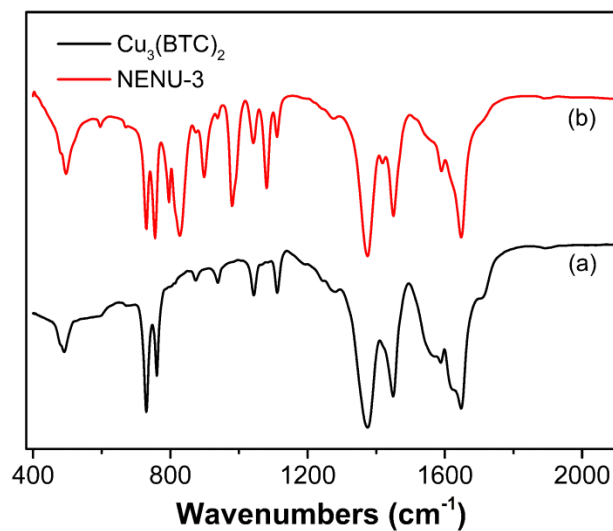

**Figure S8.** FT-IR spectra of (a)  $\text{Cu}_3(\text{BTC})_2$  and (b) NENU-3.

### Adsorption procedure:

The  $\text{BrO}_3^-$ ,  $\text{Cl}^-$ , and  $\text{Br}^-$  stock solutions ( $1 \text{ g L}^{-1}$ ) were prepared by dissolving  $\text{NaBrO}_3$ ,  $\text{NaCl}$ , and  $\text{NaBr}$  in deionized water, and the desired anions concentrations were obtained by diluting the stock solutions with water. The adsorption of the different inorganic anions by the NENU-3 material was performed by mixing the dried NENU-3 (50 mg) and  $\text{BrO}_3^-$ ,  $\text{Cl}^-$ , and  $\text{Br}^-$  solutions (20 mL). The mixtures were left in a stirred operating at room temperature for 12 h to reach equilibrium. After reaching adsorption equilibrium, the supernatant and the solid were separated by centrifugation at 12,000 rpm for 20 min. The concentrations of  $\text{BrO}_3^-$  and  $\text{Br}^-$  were measured by the UV-vis spectra and the concentrations of  $\text{Cl}^-$  were recorded by the potentiometric titration.

### Analytical procedure of bromate concentrations

Standard solutions for calibration were prepared by adding 1.0 mL of  $\text{H}_2\text{SO}_4$  solution (6 M) and 3.0 mL of KI solution (3 mM) as reducing agent to 10 mL brown volumetric flasks.<sup>[1, 2]</sup> After the homogenization, the solutions were left to stand for 10 min. The absorbances of the solutions were final recorded at 350 nm using the Ultraviolet-spectrophotometer (UV 2600, Shimadzu).

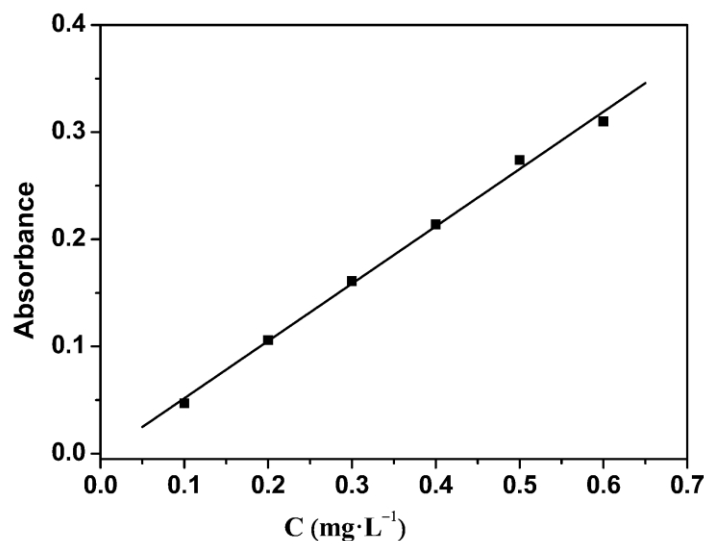

**Figure S9.** Standard curve of UV absorbance of the  $\text{BrO}_3^-$  solutions in the function of concentrations in water.

The supernatant solution containing different  $\text{BrO}_3^-$  concentrations after removing the NENU-3 material were diluted 100 fold in 10 mL brown volumetric flasks with KI solution (3.0 mL, 3.0

mM) and  $\text{H}_2\text{SO}_4$  solution (1.0 mL, 6 M), and then the concentrations were estimated by monitoring the absorbances at 350 nm using a UV–vis spectrophotometer. The amount of  $\text{BrO}_3^-$  was verified by using the standard curve of  $\text{BrO}_3^-$  solutions.

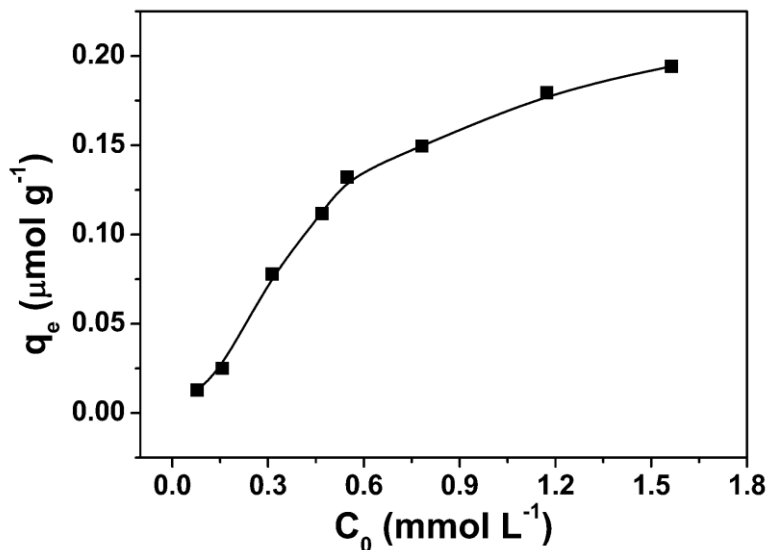

**Figure S10.** Adsorption isotherm for  $\text{BrO}_3^-$  on NENU-3.

#### Analytical procedure of $\text{Cl}^-$ concentrations

The  $\text{AgNO}_3$  solution (1 L, 14 mM) containing the concentrated nitric acid (2 mL, 14 M) was prepared at the dark condition. The standard solution of  $\text{NaCl}$  (14.1 mM) was used as the titrant. The concentration of  $\text{AgNO}_3$  solution was recorded by an automatic potentiometric titration instrument (Model ZDJ-4A, Shanghai Precision & Scientific Instrument Corporation, China).<sup>[3, 4]</sup> A chloride ion-selective electrode, a calomel electrode outer chamber filled with 2 M  $\text{NaNO}_3$  and a silver electrode were used as working electrode, reference electrode and as counter electrode, respectively. The titrator made a sound automatically when the titration reached the end-point, and the corresponding volume was given by the end of the titration. Five replicates were performed for each sample. The concentration of  $\text{AgNO}_3$  solution was calculated equal to 12.7 mM.

The supernatant concentrations of chloride ions after the adsorption of the NENU-3 material were determined by using  $\text{AgNO}_3$  (12.7 mM) as titrant.

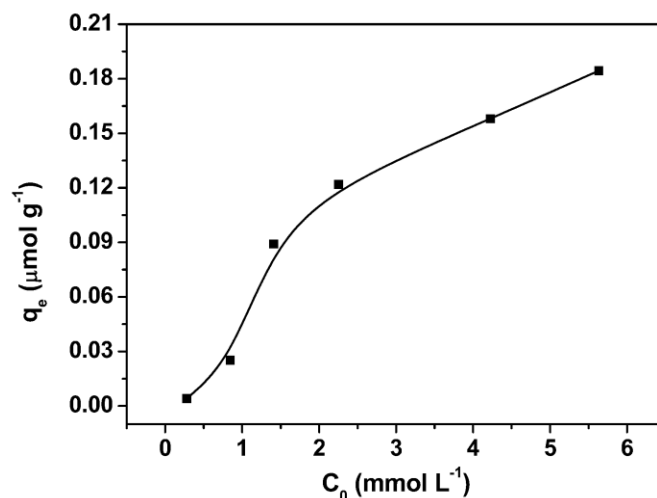

**Figure S11.** Adsorption isotherm for  $\text{Cl}^-$  on NENU-3.

### Analytical procedure of $\text{Br}^-$ concentrations

Standard solutions for calibration were prepared by following process<sup>[5, 6]</sup>: in a brown volumetric flask (25.00 mL), a given amount of  $\text{Br}^-$  solution was treated with 1.00 mL of acetate buffer solution (pH 4.6). Then 0.25 mL of phenol red solution (0.24 g L<sup>-1</sup>) and 1.00 mL of chloramine-T solution (2.0 g L<sup>-1</sup>) were added, and the solution was shaken. Exactly two minutes later, 1.00 mL of sodium thiosulphate solution (50 g L<sup>-1</sup>) was added into the above solution to decompose the excess of chloramine-T, and diluted with water to 25.00 mL. After five minutes, the absorbance of the solution was recorded at 590 nm using the Ultraviolet-spectrophotometer (UV 2600, Shimadzu).

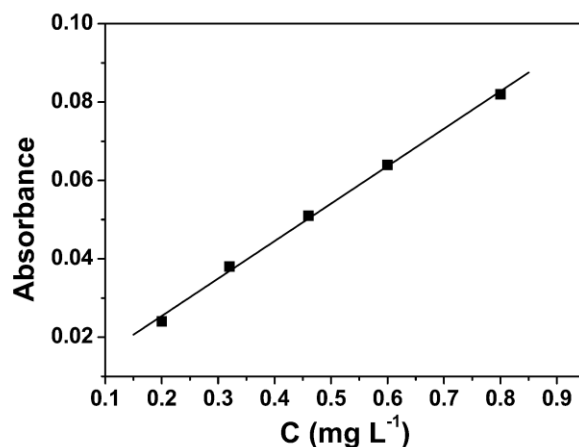

**Figure S12.** Standard curve of UV absorbances of  $\text{Br}^-$  solutions in function of concentrations.



The supernatant solution (2.00 mL) containing the different  $\text{Br}^-$  concentrations after removing the NENU-3 material were duplicated the procedure of standard solution for calibration. Then the concentrations were estimated by monitoring the absorbances at 590 nm using a UV-vis spectrophotometer. The amount of  $\text{Br}^-$  was calculated by using the standard curve of  $\text{Br}^-$  solutions.

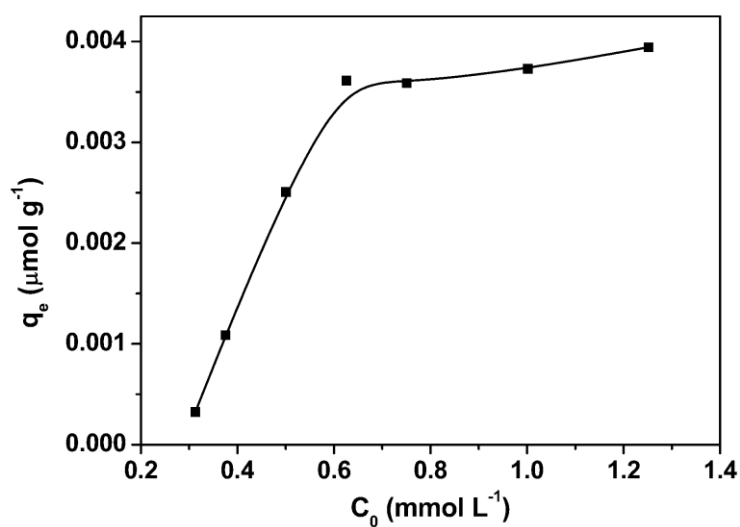

**Figure S13.** Adsorption isotherm for  $\text{Br}^-$  on NENU-3.

**Table S1** Analytical parameters for bromate determination using different modified electrodes

| Method | Material                                                                                  | Detection limit<br>( $\mu\text{mol L}^{-1}$ ) | Linear Range<br>( $\mu\text{mol L}^{-1}$ ) | Sensitivity<br>( $\mu\text{A cm}^{-2} \text{ mM}^{-1}$ ) | Reference |
|--------|-------------------------------------------------------------------------------------------|-----------------------------------------------|--------------------------------------------|----------------------------------------------------------|-----------|
| AP     | P <sub>2</sub> Mo <sub>18</sub> /OMC/GC                                                   | 0.922                                         | 2.77–4000                                  | -                                                        | 7         |
| AP     | CoW <sub>11</sub> Co/PVP/TiO <sub>2</sub> /GCE                                            | 5                                             | 20–4400                                    | -                                                        | 8         |
| CV     | tungsten oxide films                                                                      | 100                                           | 300–45000                                  | 6200                                                     | 9         |
| AP     | [SiNi(H <sub>2</sub> O)W <sub>11</sub> O <sub>39</sub> ] <sup>6-</sup> /<br>cysteamine/Au | 14.88                                         | 14–13580                                   | -                                                        | 10        |
| CV     | (EMIM) <sub>3</sub> PMo <sub>12</sub> O <sub>40</sub> (1)/CPE                             | -                                             | 1250–7500                                  | -                                                        | 11        |
| AP     | (MWCNT-PLL)/Hb                                                                            | 0.96                                          | 15–6000                                    | 7.56                                                     | 12        |
| AP     | Ag/MWNTs                                                                                  | -                                             | 500–4000<br>4000–20000                     | 580.33<br>121.44                                         | 13        |
| AP     | PMo <sub>12</sub> /CNTs/PEDOT                                                             | -                                             | 100–2000                                   | 32                                                       | 14        |
| AP     | NENU-3 film                                                                               | 12                                            | 50 – 19100<br>19100 – 72740                | 11.2<br>5.08                                             | This work |

### Reference

1. Romele, L. *Analyst*, **1998**, 123, 291-294.
2. Al-Saidi, H. M. *Eur. J. chem.*, **2012**, 3, 202-207.
3. Climent, M. A., Viqueira, E., de Vera, G., López-Atalaya, M. M. *Cement Concrete Res.*, 1999, **29**, 893-898.
4. Ramsay, J. A., Brown, R. H. J., Croghan, P. C. *J. Exp. Biol.*, **1955**, 32, 822-829.
5. Jones, D. R. *Talanta*, **1989**, 36, 1243-1247.
6. F. D. Hajna. *Anal. Chem.*, 1984, 56, 2961-2963.
7. Zhou, M., Guo, L. P., Lin, F. Y., Liu, H. X. *Anal. Chim. Acta*, **2007**, 587, 124-131.
8. Li, Y., Bu, W., Wu, L., Sun, C. *Sens. Actuators, B* **2005**, 107, 921-928.
9. Casella, I. G., Contursi, M. *Electrochim. Acta*, **2005**, 50, 4146-4154.
10. Chen, C., Song, Y., Wang, L. *Electrochim. Acta*, **2009**, 54, 1607-1611.
11. Wang, R., Jia, D., Cao, Y. *Electrochim. Acta*, **2012**, 72, 101-107.

12. Li, Y., Chen, S. M., Thangamuthu, R., AjmalAli, M., Al-Hemaid, F. M. A. *Electroanalysis*, **2014**, *26*, 996-1003.
13. Li, Q., Zhang, Q., Ding, L., Zhou, D., Cui, H., Wei, Z., Zhai, J. *Chem. Eng. J.* **2013**, *217*, 28-33.
14. Skunik, M., Kulesza, P. J. *Anal. Chim. Acta*, **2009**, *631*, 153-160.
